# Supplementary material for: Clinical next generation sequencing to identify actionable aberrations in a phase I program
Source: PubMed Central journal article supplement (PMC4652990; doi:10.18632/oncotarget.4040), 2015-05-08
Supplement: oncotarget-06-20099-s001.pdf [file oncotarget-06-20099-s001.pdf]

## Clinical next generation sequencing to identify actionable aberrations in a phase I program

### Supplementary Material

Supplementary Table 1: Codons tested on Ampliseq 46 gene Assay.

| Gene    | Exons (codons) tested                                                                                                                                                                                                                                                |
|---------|----------------------------------------------------------------------------------------------------------------------------------------------------------------------------------------------------------------------------------------------------------------------|
| ABL1    | 4 (237-260), 5 (275-283), 6 (303-319), 7 (387-412)                                                                                                                                                                                                                   |
| AKT1    | 3 (16-59)                                                                                                                                                                                                                                                            |
| ALK     | 23 (1172-1177), 25 (1259-1277)                                                                                                                                                                                                                                       |
| APC     | 16 (865-886), 16 (1105-1122), 16 (1289-1322), 16 (1349-1382), 16 (1430-1467), 16 (1487-1509), 16 (1549-1564)                                                                                                                                                         |
| ATM     | 8 (343-355), 9 (395-412), 12 (601-614), 17 (837-862), 26 (1307-1324), 34 (1674-1693), 35 (1733-1758), 36 (1785-1802), 39 (1935-1957), 50 (2436-2445), 54 (2650-2667), 55 (2693-2715), 56 (2721-2739), 59 (2888-2891), 61 (2937-2950), 63 (2996-3016), 63 (3037-3052) |
| BRAF    | 11 (439-471), 15 (581-605)                                                                                                                                                                                                                                           |
| CDH1    | 3 (69-92), 8 (351-373), 9 (395-415)                                                                                                                                                                                                                                  |
| CDKN2A  | 2 (51-76)                                                                                                                                                                                                                                                            |
| CSF1R   | 7 (299-318), 22 (952-973)                                                                                                                                                                                                                                            |
| CTNNB1  | 3 (12-45)                                                                                                                                                                                                                                                            |
| EGFR    | 3 (89-125), 7 (280-297), 15 (575-601), 18 (698-722), 19 (729-761), 20 (766-790), 20 (803-823), 21 (830-866)                                                                                                                                                          |
| ERBB2   | 19 (753-769), 20 (772-797), 21 (832-852), 21 (875-883)                                                                                                                                                                                                               |
| ERBB4   | 3 (136-141), 4 (177-186), 6 (234-247), 7 (272-289), 8 (303-322), 9 (343-363), 15 (588-619), 23 (923-943)                                                                                                                                                             |
| FBXW7   | 5 (264-279), 8 (381-400), 9 (450-472), 10 (478-506), 11 (566-583)                                                                                                                                                                                                    |
| FGFR1   | 4 (121-139), 7 (247-268)                                                                                                                                                                                                                                             |
| FGFR2   | 7 (250-268), 7 (297-313), 9 (367-395), 12 (546-558)                                                                                                                                                                                                                  |
| FGFR3   | 7 (247-268), 9 (377-409), 14 (634-653), 16 (681-712), 18 (790-807)                                                                                                                                                                                                   |
| FLT3    | 11 (441-458), 14 (569-575), 16 (662-682), 20 (828-846)                                                                                                                                                                                                               |
| GNAS    | 8 (196-218)                                                                                                                                                                                                                                                          |
| HNF1A   | 3 (198-217), 4 (253-282)                                                                                                                                                                                                                                             |
| HRAS    | 2 (5-23), 3 (48-79)                                                                                                                                                                                                                                                  |
| IDH1    | 4 (118-134)                                                                                                                                                                                                                                                          |
| JAK2    | 14 (604-622)                                                                                                                                                                                                                                                         |
| JAK3    | 13 (568-578), 16 (709-729)                                                                                                                                                                                                                                           |
| KDR     | 6 (240-258), 7 (267-280), 11 (472-490), 19 (872-892), 21 (959-985), 26 (1138-1161), 27 (1192-1216), 30 (1301-1321), 30 (1336-1356)                                                                                                                                   |
| KIT     | 2 (47-69), 9 (501-514), 10 (536-549), 11 (550-585), 13 (641-664), 14 (664-684), 15 (714-728), 17 (807-828), 18 (836-854)                                                                                                                                             |
| KRAS    | 2 (5-28), 3 (40-67), 4 (136-150)                                                                                                                                                                                                                                     |
| MET     | 2 (160-187), 2 (362-379), 14 (992-1017), 16 (1105-1126), 19 (1247-1268)                                                                                                                                                                                              |
| MLH1    | 12 (373-393)                                                                                                                                                                                                                                                         |
| MPL     | 10 (499-522)                                                                                                                                                                                                                                                         |
| NOTCH1  | 26 (1566-1605), 27 (1673-1697)                                                                                                                                                                                                                                       |
| NPM1    | 11 (283-295)                                                                                                                                                                                                                                                         |
| NRAS    | 2 (6-22), 3 (53-69)                                                                                                                                                                                                                                                  |
| PDGFRA  | 12 (552-570), 14 (647-668), 15 (668-688), 18 (819-847)                                                                                                                                                                                                               |
| PIK3CA  | 2 (77-98), 5 (328-351), 8 (418-422), 10 (533-551), 14 (688-716), 21 (1019-1049), 21 (1065-1069)                                                                                                                                                                      |
| PTEN    | 1 (5-24), 3 (55-70), 6 (167-184), 7 (212-222), 7 (240-266), 8 (282-300), 8 (316-342)                                                                                                                                                                                 |
| PTPN11  | 3 (53-82), 13 (486-506)                                                                                                                                                                                                                                              |
| RB1     | 4 (132-154), 6 (195-203), 11 (350-371), 17 (549-565), 18 (566-585), 20 (655-680), 21 (703-724), 22 (743-770)                                                                                                                                                         |
| RET     | 10 (609-627), 11 (630-654), 13 (762-774), 15 (880-901), 16 (914-931)                                                                                                                                                                                                 |
| SMAD4   | 3 (109-128), 5 (167-184), 6 (228-247), 8 (304-319), 9 (330-363), 10 (385-404), 11 (444-472), 12 (497-526)                                                                                                                                                            |
| SMARCB1 | 2 (39-55), 4 (154-167), 5 (182-203), 9 (373-386)                                                                                                                                                                                                                     |
| SMO     | 3 (186-218), 5 (310-340), 6 (399-418), 9 (516-542), 11 (626-646)                                                                                                                                                                                                     |
| SRC     | 14 (514-534)                                                                                                                                                                                                                                                         |
| STK11   | 1 (30-62), 4 (174-1999), 6 (253-281), 8 (325-360)                                                                                                                                                                                                                    |
| TP53    | 2 (1-18), 4 (81-114), 5 (126-135), 5 (149-181), 6 (187-223), 7 (230-253), 8 (269-306), 10 (332-344)                                                                                                                                                                  |
| VHL     | 1 (88-110), 2 (120-149), 3 (157-175)                                                                                                                                                                                                                                 |

Supplementary Table 2: List of likely germline variants

| Gene          | Codon | WildType | VariantType |
|---------------|-------|----------|-------------|
| <b>ABL1</b>   | 247   | K        | R           |
| <b>APC</b>    | 870   | P        | S           |
| <b>APC</b>    | 1317  | E        | Q           |
| <b>ATM</b>    | 410   | V        | A           |
| <b>ATM</b>    | 604   | P        | S           |
| <b>ATM</b>    | 858   | F        | L           |
| <b>ATM</b>    | 1309  | A        | T           |
| <b>ATM</b>    | 1691  | S        | R           |
| <b>FGFR3</b>  | 384   | F        | L           |
| <b>JAK3</b>   | 132   | P        | T           |
| <b>JAK3</b>   | 722   | V        | I           |
| <b>KDR</b>    | 482   | C        | R           |
| <b>KDR</b>    | 1356  | V        | A           |
| <b>KIT</b>    | 541   | M        | L           |
| <b>MET</b>    | 168   | E        | D           |
| <b>MET</b>    | 362   | M        | T           |
| <b>MET</b>    | 375   | N        | S           |
| <b>MET</b>    | 1010  | T        | I           |
| <b>MLH1</b>   | 384   | V        | D           |
| <b>PIK3CA</b> | 391   | I        | M           |
| <b>STK11</b>  | 354   | F        | L           |
| <b>TP53</b>   | 273   | R        | H           |

Supplementary Table 3: List of potentially actionable genes and therapeutic implications

| Gene                | Potential Therapeutic Implications                                           |
|---------------------|------------------------------------------------------------------------------|
| <b>AKT1</b>         | Treatment with AKT or mTOR inhibitors                                        |
| <b>ATM</b>          | Treatment with PARP inhibitors                                               |
| <b>BRAF</b>         | Treatment with BRAF inhibitors                                               |
| <b>CDKN2A</b>       | Treatment with CDK 4/6 inhibitors                                            |
| <b>CSF1R</b>        | Treatment with CSF1R inhibitors                                              |
| <b>EGFR</b>         | Treatment with EGFR inhibitors                                               |
| <b>ERBB2 (HER2)</b> | Treatment with HER2 inhibitors, monoclonal antibodies, and targeted vaccines |
| <b>ERBB4 (HER4)</b> | Treatment with HER4 inhibitors                                               |
| <b>FGFR1</b>        | Treatment with FGFR1 inhibitors                                              |
| <b>FGFR2</b>        | Treatment with FGFR2 inhibitors                                              |
| <b>FGFR3</b>        | Treatment with FGFR3 inhibitors                                              |
| <b>GNA11</b>        | Treatment with PKC and MEK inhibitors                                        |
| <b>HRAS</b>         | Treatment with MEK Inhibitors                                                |
| <b>JAK2</b>         | Treatment with JAK inhibitors                                                |
| <b>JAK3</b>         | Treatment with JAK inhibitors                                                |
| <b>KDR</b>          | Treatment with KDR inhibitors                                                |
| <b>KIT</b>          | Treatment with KIT inhibitors                                                |
| <b>KRAS</b>         | Treatment with MEK Inhibitors                                                |
| <b>MET</b>          | Treatment with MET inhibitors                                                |
| <b>NOTCH1</b>       | Treatment with Gamma Secretase inhibitors (GSIs)                             |
| <b>NRAS</b>         | Treatment with MEK inhibitors                                                |
| <b>PDGFRA</b>       | Treatment with PDGFRA inhibitors                                             |
| <b>PIK3CA</b>       | Treatment with PI3K, AKT, or mTOR inhibitors                                 |
| <b>PTEN</b>         | Treatment with p110beta, AKT, or mTOR inhibitors                             |
| <b>RET</b>          | Treatment with RET inhibitors                                                |
| <b>STK11</b>        | Treatment with mTOR or AMPK inhibitors                                       |
